# Supplementary material for: Agency emerges from asymmetric access to motor information in a minimal predictive framework
Source: Research Square preprint supplement (doi:10.21203/rs.3.rs-8654046/v1), 2026-01-30
Supplement: Supplementary file 1 [file aebc056a52beb002e809f9f7.docx]

**Appendix A. Mathematical closure of agency definability**

This Appendix provides a formal argument showing that the simulation results reported in the main text are not contingent on parameter tuning or numerical coincidence, but follow necessarily from the informational structure of the model. The argument proceeds in three steps.

**A.1 Vanishing expectation of the agency index in symmetric systems**

Consider a predictive system consisting of two models, L and R, that share identical learning objectives and identical information sets. This includes both symmetric motor-aware architectures, in which both models access the motor command m(t), and symmetric motor-blind architectures, in which neither model accesses it.

Assume that both models are trained using standard least-squares–based learning rules (or equivalently, stochastic gradient descent on mean squared prediction error) with identical learning rates and noise statistics. Under these conditions, the parameter estimates of the two models, w_L(t) and w_R(t), follow identical stochastic update equations driven by the same input statistics.

By standard results in adaptive filtering and stochastic approximation, both parameters converge in expectation to the same stationary value,

Consequently, the prediction error distributions of the two models become identical in expectation, yielding

By definition, the agency index is given by

Therefore, in the stationary limit,

This result holds irrespective of absolute prediction accuracy. Even if both models achieve arbitrarily low prediction error, the symmetric system lacks any statistical basis for assigning a privileged causal label to one model over the other. Agency attribution is therefore impossible in symmetric architectures in expectation.

**A.2 Explanatory separation induced by informational asymmetry**

We now consider the asymmetric architecture studied in the main text. The right predictive system has no access to the motor command m(t) and is restricted to predicting sensory input s(t) from past sensory observations alone. In this setting, the optimal predictor available to the right system is an estimate of the dominant temporal correlation of the sensory stream, captured by an autoregressive coefficient ρ.

Formally, from the perspective of the right system, the motor command m(t) is statistically independent of its accessible information set and therefore acts as an unpredictable, zero-mean noise term. No parameter choice within the right model can reduce the variance contributed by this component.

In contrast, the left predictive system has access to m(t − τ) and can explicitly model the motor-dependent component of sensory input. As a result, the left system can cancel variance associated with motor-related fluctuations that remain irreducible for the right system.

This asymmetry induces an irreducible separation in explanatory power:

E[|ε_L|] < E[|ε_R|]

under conditions in which the assumed temporal alignment is correct. The emergence of a positive agency index,

E[A(t)] > 0,

thus follows directly from the presence of information that is cancelable for one model but not for the other. No additional architectural complexity is required. Informational asymmetry alone is sufficient to generate explanatory separation.

**A.3 Abrupt reversal of explanatory dominance under delay mismatch**

Finally, we analyze the effect of temporal mismatch between the delay assumed by the left predictive model and the delay governing the generative process.

The prediction error of the left (motor-conditioned) model depends explicitly on the alignment between m(t − τ_self) and the sensory consequences generated at delay τ_world. For small mismatches Δτ = τ_world − τ_self, a Taylor expansion shows that the expected prediction error of the left model increases approximately quadratically,

E[|ε_L|] ≈ E[|ε_L|]_min + c · (Δτ)^2,

for some constant c > 0.

In contrast, the prediction error of the right (environment-based) model does not depend directly on τ_world, as it does not reference motor commands. Its expected error remains approximately constant with respect to Δτ.

As a result, there necessarily exists a critical delay τ_c at which

E[|ε_L|] = E[|ε_R|].

For delays exceeding this value, the inequality reverses,

E[|ε_L|] > E[|ε_R|],

leading to a sign change in the agency index. This crossing point corresponds to the abrupt reversal of explanatory dominance observed in the simulations.

Importantly, the existence of τ_c follows from the differing curvature of the error functions and does not depend on the absolute scale of time discretization. While the numerical value of τ_c varies with model resolution, the presence of a sharp transition is a structural consequence of asymmetric predictive competition.
